# Supplementary material
Source: publisher figshare collection journal article supplement (https://sage.figshare.com/ndownloader/files/31074031)
Supplement: Supplementary file 1 [file 31074031]

**Supplementary Table 1. Summary of adjuvant therapy, including specific regimens and duration of therapy.**

|                            |                |
|----------------------------|----------------|
| Any adjuvant therapy       | n=24           |
| Any chemotherapy           | n=24           |
| Any radiation therapy      | n=20           |
| First treatment            |                |
| Time to first treatment    | 5.1±5.9 months |
| Duration of therapy        | 2.3±1.6 months |
| Chemotherapy               | n=10           |
| Gemcitabine                | n=1            |
| Gemcitabine+capecitabine   | n=2            |
| Gemcitabine+platinum agent | n=7            |
| Chemoradiation             | n=14           |
| Capecitabine+XRT           | n=11           |
| 5-fluorouracil+XRT         | n=3            |
| Second treatment           |                |
| Treatment interval         | 2.9±6.0 months |
| Duration of therapy        | 1.9±0.7 months |
| Chemotherapy               | n=5            |
| Gemcitabine                | n=1            |
| Gemcitabine+capecitabine   | n=1            |
| Gemcitabine+platinum agent | n=3            |
| Chemoradiation             | n=6            |
| Capecitabine+XRT           | n=6            |

Platinum agents used include cisplatin, oxaliplatin, and carboplatin. Treatment interval is the time between the end of the first treatment and the beginning of the second treatment.

Data presented as either number of patients or mean ± standard deviation

Abbreviations: XRT – external beam radiation therapy
